# Supplementary material for: Prevalence and Risk Factors for Absconding from an Open-Door, No-Restraint Inpatient Psychiatric Unit: A Single-Center Study in Italy
Source: MDPI journal article supplement (doi:10.3390/bs13010058), 2023-01-08
Supplement: s1 [file s1]

**Supplementary Table S1.** Multi-variate analysis: Poisson's regression on absconding from GHPU.

| Predictor                            | Coefficient ±SE | ±95% CI          |     | IRR ±SE       | ±95% CI          |
|--------------------------------------|-----------------|------------------|-----|---------------|------------------|
| Intercept                            | -3.490 ±0.521   | [-4.512, -2.468] | *** | +0.031 ±0.016 | [+0.011, +0.085] |
| Duration of hospitalization (days)   | -0.091 ±0.031   | [-0.152, -0.030] | **  | +0.913 ±0.028 | [+0.859, +0.971] |
| Compulsory hospitalization (=1)      | +1.056 ±0.321   | [+0.427, +1.684] | *** | +2.874 ±0.921 | [+1.533, +5.387] |
| Male (=1)                            | +1.442 ±0.375   | [+0.708, +2.176] | *** | +4.227 ±1.583 | [+2.029, +8.808] |
| Age at hospitalization (years)       | -0.026 ±0.009   | [-0.044, -0.008] | **  | +0.974 ±0.009 | [+0.957, +0.992] |
| Non-Caucasian ethnicity (=1)         | +0.979 ±0.272   | [+0.445, +1.512] | *** | +2.661 ±0.724 | [+1.561, +4.537] |
| Already known to the PU (=1)         | +0.274 ±0.296   | [-0.306, +0.855] |     | +1.315 ±0.390 | [+0.736, +2.351] |
| Other episodes of absconding (=1)    | +1.468 ±0.308   | [+0.865, +2.072] | *** | +4.342 ±1.337 | [+2.375, +7.940] |
| Unknown to health services (=1)      | +1.197 ±0.356   | [+0.498, +1.895] | *** | +3.309 ±1.179 | [+1.646, +6.651] |
| Anxiety and somatoform disorder (=1) | -0.616 ±0.455   | [-1.508, +0.276] |     | +0.540 ±0.246 | [+0.221, +1.318] |
| Substance abuse (=1)                 | +0.908 ±0.341   | [+0.240, +1.577] | **  | +2.480 ±0.846 | [+1.271, +4.840] |
| Other/Unclassified condition (=1)    | +0.548 ±0.407   | [-0.250, +1.347] |     | +1.730 ±0.705 | [+0.779, +3.846] |

CI, Confidence Interval (calculated using robust standard errors); GHPU, General Hospital Psychiatry Unit; IRR, Incident Rate Ratios (calculated with  $\Delta$ -method); SE, Robust Standard Error; Statistical significance of the predictors, with: \*,  $p < 0.050$ ; \*\*,  $p < 0.010$ ; \*\*\*,  $p < 0.001$
